# Supplementary material for: A cell cycle kinase with tandem sensory PAS domains integrates cell fate cues
Source: PubMed Central journal article supplement (PMC4853435; doi:10.1038/ncomms11454), 2016-04-27
Supplement: ncomms11454-s1.pdf [file ncomms11454-s1.pdf]

## Supplementary Figures

*Caulobacter crescentus* NA1000  
*cckA::gent* + pP<sub>*cckA*</sub>-*cckA*-eyfp

*ΔcckA* / *ctrA-D51E*  
*cckA*-eyfp  
*cckA*- $\Delta$ PAS-B-eyfp  
*cckA*- $\Delta$ PAS-A-eyfp

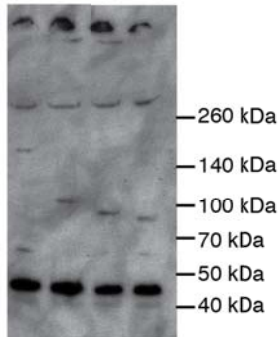

**Supplementary Figure 1. CckA-eYFP constructs are stably expressed *in vivo*.** Cells expressing plasmid-borne WT CckA-eYFP, CckA-eYFP  $\Delta$ PAS-B, and CckA-eYFP  $\Delta$ PAS-A as the sole copy of CckA were harvested at mid-log phase and normalized for cell-density. A strain with no copy of CckA, kept viable by the phosphomimetic mutation CtrA D51E, was used as a negative control. Cell lysates were denatured, subjected to SDS-PAGE, transferred to a PVDF membrane, and subsequently blotted for CckA-eYFP using an anti-CckA antibody. Bands were detected via chemiluminescence with a goat-anti-rabbit secondary antibody conjugated to horseradish peroxidase.

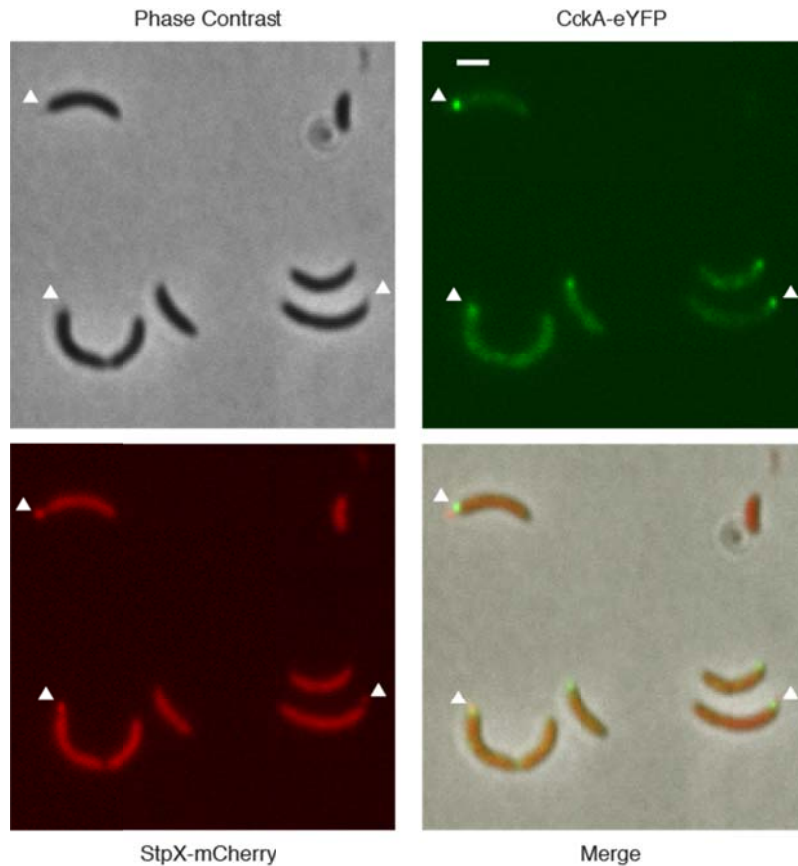

**Supplementary Figure 2. StpX-mCherry functions as a polar marker for definitive**

**identification of monopolar CckA-eYFP accumulations.** A subcellular localization assay shows that plasmid-borne CckA can accumulate only at the stalked pole of the cell. The stalk pole protein StpX, which localizes to the stalk in addition to the cell body, can better illustrate the location of short stalks than phase contrast alone. CckA-eYFP was expressed from its native promoter on a low-copy replicating plasmid for each construct, with the chromosomal copy of CckA deleted. The heterogeneity of the low copy replicating plasmid segregation leads to a small fraction of cells not receiving the CckA-eYFP plasmid, as in the top right cell. StpX-mCherry was expressed as the sole copy from its native promoter on the chromosome. White arrowheads indicate the stalked pole in each image. Scale bar shown in eYFP panel, 2  $\mu$ m, same for every panel.

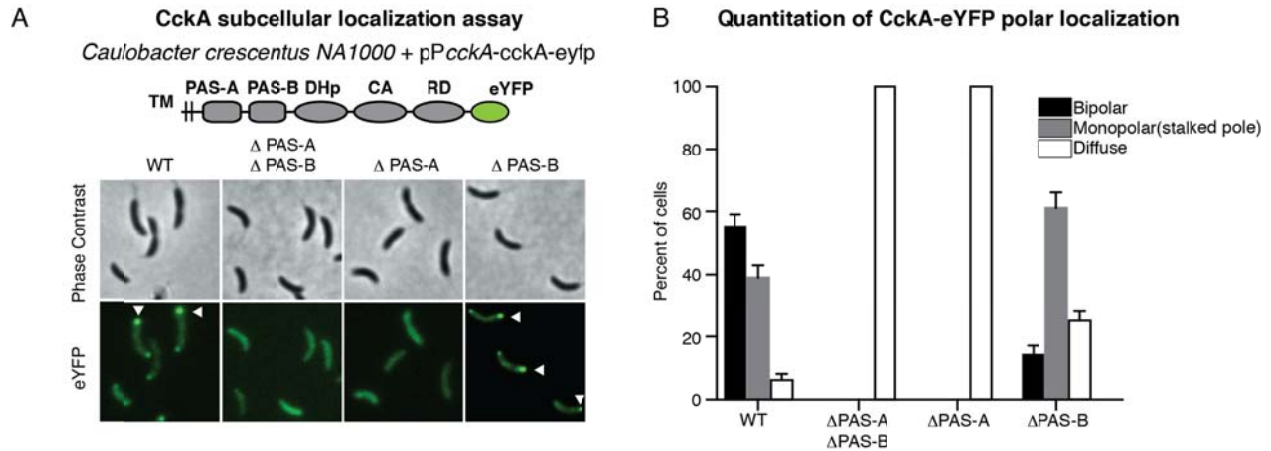

**Supplementary Figure 3. CckA-eYFP requires its PAS domains for proper subcellular localization.** (A) A subcellular localization assay shows that CckA's PAS domain A is necessary for polar accumulation *in vivo*. A cartoon representation the domain architecture of full-length CckA is shown with its N-terminal transmembrane tether and a C-terminal eYFP label. CckA-eYFP was expressed from its native promoter on a low-copy replicating plasmid for each construct. White arrowheads indicate the stalked pole in the eYFP image. (B) Quantitation of the proportion of cells in which CckA-eYFP localized to both cell poles (black bar), formed a single focus at the stalked pole (gray bar), or remained diffuse over the membrane (white bar). Deletion of PAS-B resulted in a shift towards stalked pole localization, while deletion of PAS-A totally abrogated subcellular accumulation at the poles. Error bars represent the standard deviation of three representative fields of cells (N > 400 cells for each construct).



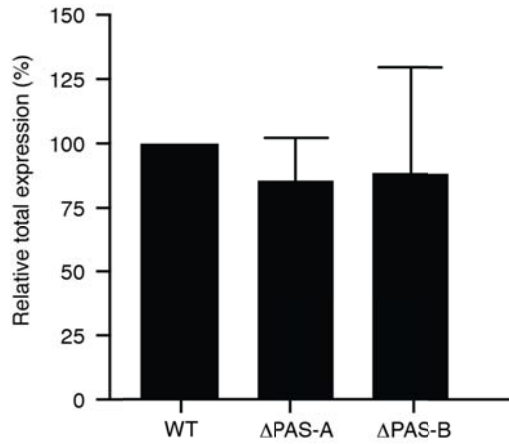

**Supplementary Figure 5. Expression of Rho is consistent across CckA-eYFP variants.** RT-qPCR assays of the expression of the transcription terminating gene Rho show that total expression of Rho remains consistent between CckA-eYFP variant strains, consistent with its promoter lacking a CtrA-binding motif. Expression was quantified by comparing the threshold cycles ( $C_T$ ) for Rho between strains. Error bars represent the standard deviation of three biological replicates, each composed of at least two technical replicates.

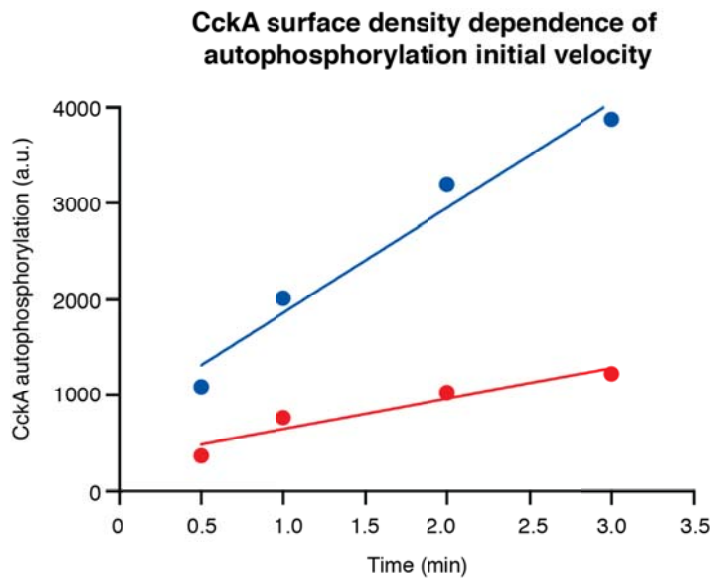

**Supplementary Figure 6. CckA autophosphorylation initial velocity increases with increasing CckA surface density.** Purified 5  $\mu\text{M}$  CckA WT was incubated with 0.5 mM ATP and 4.2  $\mu\text{Ci}$  [ $\gamma$ - $^{32}\text{P}$ ] ATP at different CckA surface densities on liposomes. Autophosphorylation was assayed during the initial, linear phase of the reaction (0.5, 1, 2, 3 minutes). Samples were quenched into SDS sample buffer, blotted onto nitrocellulose and followed by phosphorimaging. Example data is shown for CckA at 800 (blue) and 200 (red) CckA molecules per liposome.

**A Relative CckA kinase activity levels of domain deletion mutants in solution**

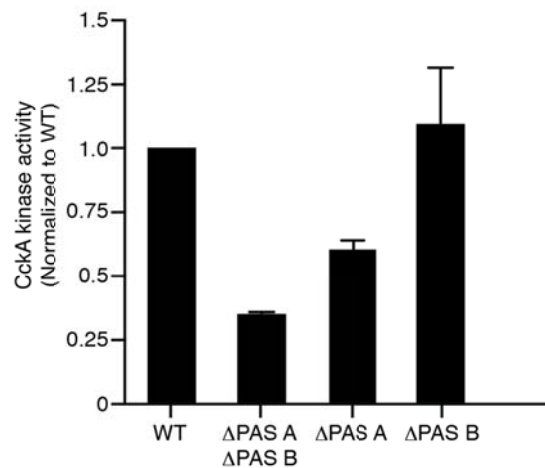

**B Ionic strength titration of WT CckA kinase activity in solution**

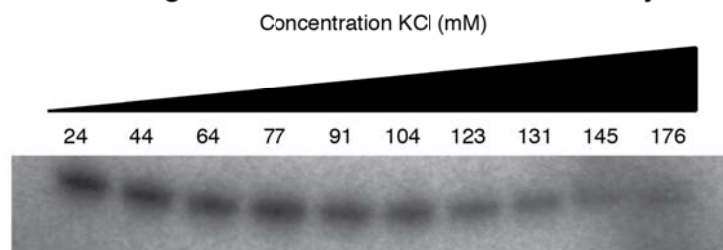

**Supplementary Figure 7. CckA PAS domain deletions are active in solution, and CckA kinase activity is highly sensitive to ionic strength.** (A) A panel of purified CckA domain deletion mutants was assayed for kinase activity in solution for a reaction period of three minutes. All four constructs were functional and capable of autophosphorylation. Error bars correspond to the range of two experiments. (B) WT CckA kinase activity is higher in low salt

solutions than in high salt solutions. Purified WT CckA at 3  $\mu\text{M}$  was incubated with different concentrations of KCl in solution for 10 minutes, and autophosphorylation was initiated by the addition of [ $\gamma$ - $^{32}\text{P}$ ] ATP. After a reaction period of 8 minutes, samples were quenched into SDS sample buffer and subjected to gel electrophoresis. Autophosphorylation was measured by phosphorimaging.

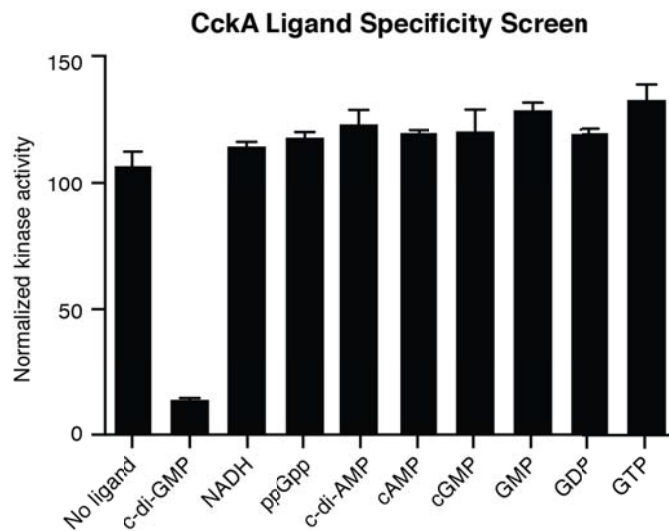

**Supplementary Figure 8. Inhibition of CckA is specific for c-di-GMP.** Purified CckA 5  $\mu\text{M}$  was incubated in the presence of 0.5 mM ATP and 4.2  $\mu\text{Ci}$  [ $\gamma$ - $^{32}\text{P}$ ] ATP for 15 minutes in the presence of potential cytosolic small molecules (NADH, ppGpp) and chemically related species to c-di-GMP (c-di-AMP and others), each at 250  $\mu\text{M}$ . Samples were quenched into SDS sample buffer, blotted onto nitrocellulose and followed by phosphorimaging. Error bars represent the standard deviation of three experiments.

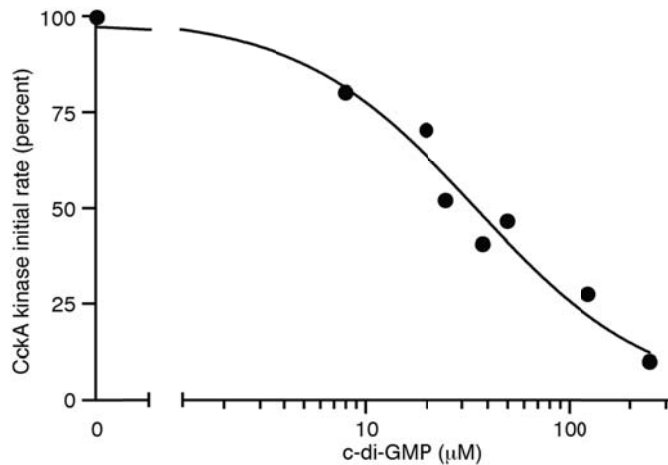

**Supplementary Figure 9. C-di-GMP inhibits CckA autophosphorylation initial rate.** C-di-GMP inhibits CckA kinase activity in an initial rate assay. Purified 5  $\mu\text{M}$  CckA WT was incubated with  $[\gamma\text{-}^{32}\text{P}]$  ATP and increasing concentrations of c-di-GMP, and autophosphorylation was assayed during the initial, linear phase of the reaction (0.5, 1, 1.5, 2, 3 minutes). Samples were quenched into SDS sample buffer, blotted onto nitrocellulose and followed by phosphorimaging. Activity is normalized to the zero c-di-GMP condition. The data provided are from one experiment.



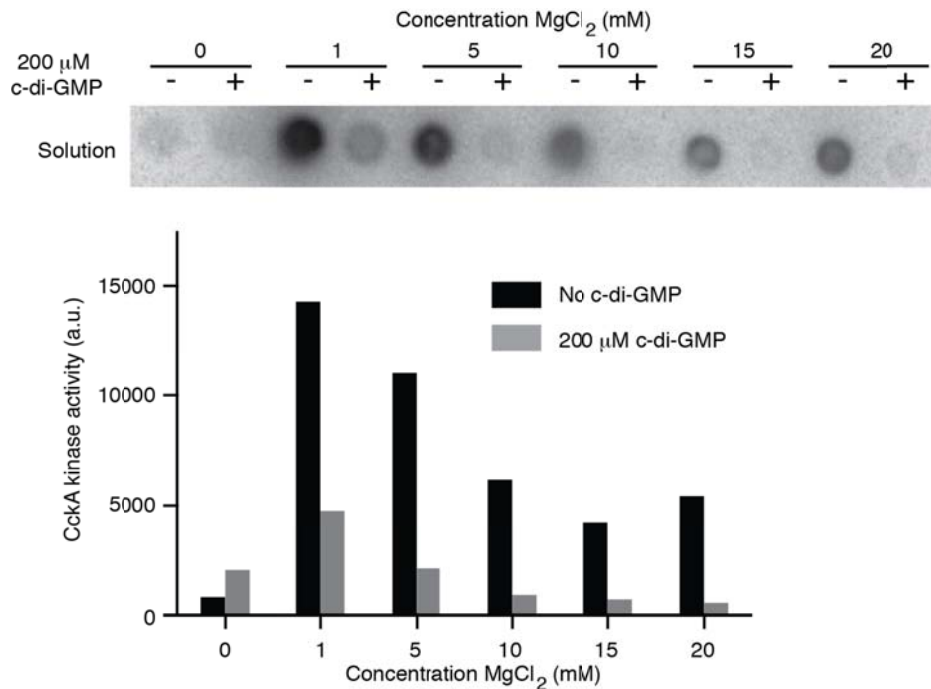

**Supplementary Figure 10. C-di-GMP inhibition of CckA is magnesium-dependent.** CckA in kinase buffer was allowed to pre-incubate with MgCl<sub>2</sub> and with (gray) or without (black bars) 200 μM c-di-GMP for 15 minutes. The final concentration of CckA in solution was 5 μM. CckA was then incubated with [ $\gamma$ -<sup>32</sup>P] ATP for 8 minutes. Samples were quenched into SDS sample buffer, blotted onto nitrocellulose and followed by phosphorimaging. Raw data from the nitrocellulose membrane capture assay is shown. While Mg<sup>2+</sup> was necessary for CckA kinase activity, increasing Mg<sup>2+</sup> past 1 mM resulted in decreased kinase activity but also increased potency of c-di-GMP inhibition. The data provided are from a single experiment.

### CckA surface density dependence of phosphatase activity

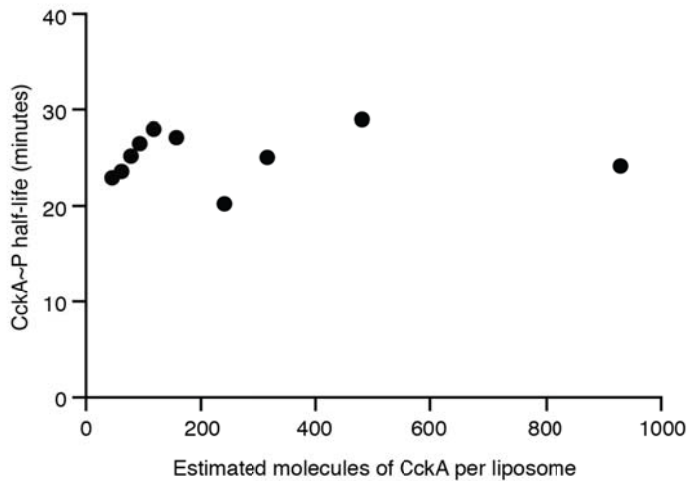

### Supplementary Figure 11. CckA surface density effects on CckA~P half-life are minimal.

CckA~P half-life was assayed by allowing the protein to phosphorylate in solution prior to purification away from ATP. CckA~P was then titrated at 5 mM onto increasing amounts of liposomes, creating a range of CckA~P surface densities. Dephosphorylation was monitored by quenching samples in SDS sample buffer at time points from 0 to 70 minutes after addition to the liposomes. Extent of phosphorylation was assayed by blotting the quenched reactions onto nitrocellulose and the blot was measured by phosphorimaging. CckA half-lives were measured by fitting the data to a single exponential decay. CckA~P half-life was approximately unchanged over a 19-fold CckA surface density range from approximately 50 to 950 CckA molecules per liposome, with a potentially mild linear increase from 23 to 28 minutes at low density. The data provided are from a single experiment.

**Supplementary table 1 Plasmids and strains used in this study.**

| Plasmid                          | Description                                                 | Reference                    |
|----------------------------------|-------------------------------------------------------------|------------------------------|
| pET-28b(+)                       | bacterial expression vector                                 | Novagen                      |
| pTEV5                            | bacterial expression vector                                 | 3                            |
| pJAB27                           | pET-28b(+) CckA(70-691) expression vector                   | 4                            |
| pJAB41                           | pET-28b(+) CckA(70-295) expression vector                   | This Study                   |
| pJAB42                           | pET-28b(+) CckA(70-378) expression vector                   | This Study                   |
| pJAB43                           | pET-28b(+) CckA(70-544) expression vector                   | This Study                   |
| pJAB44                           | pET-28b(+) CckA(197-544) expression vector                  | This Study                   |
| pJAB45                           | pET-28b(+) CckA(294-544) expression vector                  | This Study                   |
| pJAB46                           | pET-28b(+) CckA(197-691) expression vector                  | This Study                   |
| pJAB47                           | pET-28b(+) CckA(294-691) expression vector                  | This Study                   |
| pTM19                            | pTEV5-CckA(70-182; fused to 296-691) expression vector      | This Study                   |
| pTM38                            | pTEV5-CckA(70-182;296-544) expression vector                | This Study                   |
| pWSC30                           | pET-28b(+) PleC(310-842) expression vector                  | 5                            |
| pAP433                           | pTEV5-DivJ(188-595) expression vector                       | Perez et al., in preparation |
| pAP500                           | pCHYC-2 stpX                                                | Perez et al., in preparation |
| pRVYFPC-6                        | Low copy, replicating, C-terminal eyfp fusion vector        | 6                            |
| pTM28                            | pRVYFPC-6 CckA(1-691)                                       | This Study                   |
| pTM31                            | pRVYFPC-6 CckA(1-69; fused to 197-691)                      | This Study                   |
| pTM32                            | pRVYFPC-6 CckA(1-69; fused to 294-691)                      | This Study                   |
| pTM33                            | pRVYFPC-6 CckA(1-182; fused to 296-691)                     | This Study                   |
| Strain                           | Description                                                 | Reference                    |
| <i>C. crescentus</i> NA1000      | Laboratory Caulobacter crescentus strain                    | 5                            |
| <i>E. coli</i> DH5 $\alpha$      | Bacterial cloning strain                                    | Invitrogen                   |
| <i>E. coli</i> Rosetta(DE3)pLysS | Bacterial expression strain                                 | Novagen                      |
| <i>E. coli</i> BL21 LS3382       | Bacterial expression strain NA1000 cckA::gent + pMR10-cckA  | Novagen                      |
| WSC229                           | pET-28b(+) PleC expression vector                           | 7                            |
| AP434                            | BL21 pTEV5 DivJ(188-595)                                    | 5                            |
| AP501                            | NA1000 stpX::stpX-mCherry                                   | Perez et al., in preparation |
| JAB70                            | Rosetta pET-28b(+) CckA(70-691) expression vector           | Perez et al., in preparation |
| JAB97                            | Rosetta pET-28b(+) CckA(70-295) expression vector           | 4                            |
| JAB98                            | Rosetta pET-28b(+) CckA(70-378) expression vector           | This Study                   |
| JAB99                            | Rosetta pET-28b(+) CckA(70-544) expression vector           | This Study                   |
| JAB100                           | Rosetta pET-28b(+) CckA(197-544) expression vector          | This Study                   |
| JAB101                           | Rosetta pET-28b(+) CckA(294-544) expression vector          | This Study                   |
| WSC282                           | Rosetta pET-28b(+) CckA(197-691) expression vector          | This Study                   |
| WSC283                           | Rosetta pET-28b(+) CckA(294-691) expression vector          | This Study                   |
| THM48                            | BL21 pTEV5-CckA(70-182; fused to 296-691) expression vector | This Study                   |
| THM68                            | BL21 pTEV5-CckA(70-182; fused to 296-544) expression vector | This Study                   |
| AP434                            | BL21 pTEV5-DivJ(188-595) expression vector                  | This Study                   |
| THM60                            | NA1000 + pRVYFPC-6 CckA(1-691)                              | Perez et al., in preparation |
| THM72                            | NA1000 + pRVYFPC-6 CckA(1-69; fused to 197-691)             | This Study                   |

|        |                                                  |            |
|--------|--------------------------------------------------|------------|
| THM74  | NA1000 + pRVYFPC-6 CckA(1-69; fused to 294-691)  | This Study |
| THM70  | NA1000 + pRVYFPC-6 CckA(1-182; fused to 296-691) | This Study |
| THM114 | THM60 + cckA::gent transduction                  | This Study |
| THM115 | THM70 + cckA::gent transduction                  | This Study |
| THM116 | THM72 + cckA::gent transduction                  | This Study |
| THM125 | THM115 + stpX::stpX-mCherry transduction         | This Study |
| THM126 | THM116 + stpX::stpX-mCherry transduction         | This Study |
| THM127 | THM114 + stpX::stpX-mCherry transduction         | This Study |

**Supplementary table 2. Gibson cloning strategy to generate constructs.**

| Plasmid# | Strain# | Assembly method | Vector backbone | Restriction enzyme(s) | Vector insert(s)                          | Forward primer | Reverse primer | Note |
|----------|---------|-----------------|-----------------|-----------------------|-------------------------------------------|----------------|----------------|------|
| pTM19    | THM48   | Gibson          | pTEV5           | NheI                  | CckA(70-182)<br>CckA(296-691)             | tmp56<br>tmp58 | tmp57<br>tmp59 |      |
| pTM38    | THM68   | Gibson          | pTEV5           | NheI                  | CckA(70-182; fused to 296-544)            | tmp56          | tmp119         | *    |
| pTM28    | THM60   | Gibson          | pRVYFPC-6       | SacI,<br>HindIII      | CckA promoter<br>CckA(1-691)              | tmp81          | tmp75          | **   |
| pTM31    | THM72   | Gibson          | pRVYFPC-6       | SacI,<br>HindIII      | CckA promoter + (1-69)<br>CckA (197-691)  | tmp74<br>tmp81 | tmp75<br>tmp90 | **   |
| pTM32    | THM74   | Gibson          | pRVYFPC-6       | SacI,<br>HindIII      | CckA promoter + (1-69)<br>CckA (294-691)  | tmp81<br>tmp93 | tmp92<br>tmp75 | **   |
| pTM33    | THM70   | Gibson          | pRVYFPC-6       | SacI,<br>HindIII      | CckA Promoter + (1-182)<br>CckA (296-691) | tmp81<br>tmp58 | tmp94<br>tmp75 | **   |

\* The PCR template was pTM19.

\*\* The vanillate region was removed via double digest and CckA was expressed under its native promoter.

**Supplementary table 3. DNA oligonucleotides used in this study.**

| Oligo   | Plasmid(s)                           | Description            | Site | Sequence 5'-3' (Restriction site is underlined.)                    |
|---------|--------------------------------------|------------------------|------|---------------------------------------------------------------------|
| JABp64  | pJAB27<br>pJAB41<br>pJAB42<br>pJAB43 | CckA70-691<br>forward  | NdeI | GGCCTTGTC <u>CATATG</u> CGCGGCTCAGCGCTTTC<br>CGG                    |
| JABp66  | pJAB27<br>pJAB46<br>pJAB47           | CckA70-691<br>reverse  | SacI | ACTGCGGAGCTCCTACGCCCTGCAGCTGCT<br>G                                 |
| JABp99  | pJAB44<br>pJAB46                     | CckA 197<br>forward    | NdeI | ACCC <u>CATATG</u> CTGGACGCCTTCGC                                   |
| JABp100 | pJAB41                               | CckA 295<br>reverse    | SacI | ATCTGGAGCTCCTaGGACACGTCGATCATG                                      |
| JABp101 | pJAB45<br>pJAB47                     | CckA 294<br>forward    | NdeI | ACATGC <u>CATATG</u> GGTGTCCGAGCAGAAGCAGAT<br>CG                    |
| JABp102 | pJAB42                               | cckA 70-378<br>reverse | SacI | ACGAGCTCCTaCACGGTCTGCTTGCGCGA                                       |
| JABp104 | pJAB43<br>pJAB44<br>pJAB45           | CckA70-544<br>reverse  | SacI | CCGAGCTCCtATTCATAGACCGGCAGG                                         |
| tmp56   | pTM19<br>pTM38                       | CckA 70<br>forward     |      | CCAACTAGTGAAAACCTGTATTTTCAGGGCGC<br>TCGCGGCTCAGCGCTTTC              |
| tmp57   | pTM19                                | CckA 182<br>reverse    |      | TCTGCTTCTGCTCCGACGCGTCTTCCACAACC                                    |
| tmp58   | pTM19<br>pTM33                       | CckA 296<br>forward    |      | GGAAGACGCGTCGGAGCAGAAGCAGATCGAG<br>CTG                              |
| tmp59   | pTM19                                | CckA 691<br>reverse    |      | GCTCGAGAATTCCATGGCCATATGGCTTTACG<br>CCGCCTGCAGCTG                   |
| tmp73   | pTM28                                | PeckA<br>reverse       |      | GCAAGTCGGCCATCGGCGAGGTTGTACCTTTC<br>TTACGGC                         |
| tmp74   | pTM28                                | CckA 1<br>forward      |      | TACAACCTCGCCGATGGCCGACTTGCAGCTCC<br>AGG                             |
| tmp75   | pTM28<br>pTM32<br>pTM33              | CckA 691<br>reverse    |      | CGCGTAACGTTTGAATTCTCCGGAGCCGCCGC<br>CTGCAGCTGCTGC                   |
| tmp80   | pTM31                                | CckA 691<br>reverse    |      | CGCGTAACGTTTGAATTCTCCGGAGCCGCCGC<br>CTGCAGCTGCTG                    |
| tmp81   | pTM28<br>pTM31<br>pTM32<br>pTM33     | PeckA<br>forward       |      | GCTTAATGAATTACAACAGTTTTTATATAAGC<br>TTTCAATTCTCCAGAAAAGTACCTAGCCTCC |
| tmp90   | pTM31                                | CckA 69<br>reverse     |      | CGAAGGCGTCCAGAATGGCGACAAGGCCCAA<br>CACA                             |
| tmp91   | pTM31                                | CckA 197<br>forward    |      | CCTTGTCGCCATTCTGGACGCCTTCGCCGGAG<br>C                               |
| tmp92   | pTM32                                | CckA 69<br>reverse     |      | GCTTCTGCTCGGACACAATGGCGACAAGGCC<br>CAACACA                          |
| tmp93   | pTM32                                | CckA 294<br>forward    |      | CCTTGTCGCCATTGTGTCCGAGCAGAAGCAGA<br>TCGAGC                          |
| tmp94   | pTM33                                | CckA 182 rev           |      | CGATCTGCTTCTGCTCCGACGCGTCTTCCACA<br>ACCGG                           |
| tmp119  | pTM38                                | CckA 544 rev           |      | GCTCGAGAATTCCATGGCCATATGGCTCTATT<br>CATAGACCGGCAGGAAGATGC           |

|         |        |                         |      |                                                    |
|---------|--------|-------------------------|------|----------------------------------------------------|
| oap125  | pAP433 | DivJ 188<br>forward     |      | AAACCTGTATTTTCAGGGCGCTAGCGCCAGCG<br>AGATCATCGGTCTG |
| oap127  | pAP433 | DivJ 595<br>reverse     |      | GAGAATTCCATGGCCATATGGCTAGCCTAGC<br>GCGGCGCAAAGGC   |
| WSCp114 | pWSC30 | PleC 310<br>forward     | NheI | AAAAGCTAGCGTCGCCCATCGCGAGTTCATC<br>G               |
| WSCp115 | pWSC30 | PleC 842<br>reverse     | SacI | AAAAGAGCTCCCTCAGGCCGCCACGAAGTC                     |
| tmp189  |        | qpcr_ccrM1              |      | GCCGACCGTGATCGAGCCG                                |
| tmp190  |        | qpcr_ccrM2              |      | GGCACCATCGTCGAGGC                                  |
| tmp197  |        | qpcr_divK1              |      | GCAGGCGCTTGATGGTC                                  |
| tmp198  |        | qpcr_divK2              |      | GGAGCGCATCCGCGAG                                   |
| tmp201  |        | qpcr_sciP1              |      | GGTCTGCTCTCGCTCGA                                  |
| tmp202  |        | qpcr_sciP2              |      | GCCAGGCCGTGCCGA                                    |
| mdm306  |        | qpcr_rho1* <sup>8</sup> |      | GTCGAGAACGCCAACTCCAT                               |
| mdm307  |        | qpcr_rho2               |      | CGAGGGTCTTCAGGATCGC                                |

**Supplementary note 1. Calculation of the number of CckA molecules per liposome and the density of CckA per unit area.**

To calculate the number of binding sites for CckA on a liposome, we can start by computing the total surface area of the liposome. Extrusion of DOPG liposomes through 100 nm pores yields liposomes with vesicle diameters of 97-106 nm<sup>9</sup>, approximated here as 100 nm.

100 nm diameter sphere – radius = 500 Å

Surface area (SA) of a sphere =  $4\pi r^2$

$$SA = 3.14 * 10^6 \text{ \AA}^2$$

The surface area occupied by each lipid headgroup varies by headgroup identity, acyl chain length, and temperature<sup>10</sup>. For 18:1 cis-DOPG, comprising 90% of the lipid mass of the liposomes presented in this study, each headgroup occupies 69.4 Å<sup>2</sup> at 20°C and 70.8 Å<sup>2</sup> at 30°C<sup>11</sup>.

To calculate the lipids on the outer layer, we will assume similar area on average per (69.5 Å<sup>2</sup>) lipid despite 10% NTA lipid incorporation.

# lipids outer membrane = SA / (area per lipid headgroup)

$$\# \text{ lipids} = 3.14 * 10^6 \text{ \AA}^2 / (69.5 \text{ \AA}^2/\text{lipid}) = 4.52 * 10^4 \text{ lipids.}$$

There are approximately 45,000 on the outer layer. Of these, 10% (4,500) are DGS-NTA sites for possible CckA attachment.

CckA loading onto liposomes could be limited by either the number of NTA sites or by the total surface area of the liposome.

Calctool.org estimates a 622-residue protein (WT CckA) at 5.9 nm diameter. This calculation assumes that the protein is spherical.

Projecting the sphere down onto the surface of the liposome, we can calculate the surface area of one molecule of CckA as a circle of radius ~3 nm.

$$\text{Area of circle (A)} = \pi r^2$$

$A = 2,800 \text{ \AA}^2$  – this is the area on the liposome surface that the protein occupies.

$\text{SA liposome} / A_{\text{protein}} = \text{number of proteins that can fit.}$

$$3.14 * 10^6 \text{ \AA}^2 / 2,800 \text{ \AA}^2 = 1100 \text{ proteins}$$

Given that 1,100 proteins can fit by the surface area calculation and there are 4,500 NTA sites available, protein loading on the liposome is surface-area limited.

To determine the molar ratio between CckA molecules and liposome particles, we need to compute the mass of a single liposome. The mass of the lipids in the liposome will be equal to the sum of the inner and outer sheets of the bilayer.

Bilayer thickness = 3.6 nm

Inner diameter of liposome = ~96 nm.

Lipids on inner layer:

$$\text{Inner SA} / 69.5 \text{ \AA}^2 = 4.2 * 10^4 \text{ lipids on inner layer}$$

Total lipid molecules (TL) = #lipids inner + #lipids outer layer

$$\text{TL} = (4.2 + 4.5) * 10^4 = 8.7 * 10^4 \text{ lipids/liposome}$$

We used 10% DGS-NTA lipids and 90% DOPG lipids by mass. The molecular weights of the lipids are similar, so here we use their mass ratios as a proxy for their molar ratios.

Mass of liposome = (mass NTA lipids) \* (#NTA) + (mass DOPG) \* (#DOPG)

$$8.7 * 10^3 \text{ NTA lipids, } 1057 \text{ g/mol} \rightarrow 1.53 * 10^{-17} \text{ g/liposome}$$

$$7.9 * 10^4 \text{ DOPG lipids, } 797 \text{ g/mol} \rightarrow 1.05 * 10^{-16} \text{ g/liposome}$$

$$\text{Total mass of one liposome} = 1.20 * 10^{-16} \text{ g/liposome}$$



For a 5  $\mu\text{M}$  CckA sample in a 25  $\mu\text{L}$  volume, we use 8.5  $\mu\text{g}$  protein.

If we add an equal mass of lipid to protein, we reach approximately maximum loading capacity.

#Liposomes = total mass liposomes / mass per liposome

#Liposomes in reaction =  $8.5 * 10^{-6}$  g liposomes / ( $1.2 * 10^{-16}$ ) g/liposome =  $7.1 * 10^{10}$  liposomes

#CckA molecules in the reaction =  $7.5 * 10^{13}$

CckA molecules per liposome = 1100 (maximum number of CckA sites by surface area).

## Supplementary References

1. Jones, D. T. Protein secondary structure prediction based on position-specific scoring matrices. *J. Mol. Biol.* **292**, 195–202 (1999).
2. Angelastro, P. S., Sliusarenko, O. & Jacobs-Wagner, C. Polar localization of the CckA histidine kinase and cell cycle periodicity of the essential master regulator CtrA in *Caulobacter crescentus*. *J. Bacteriol.* **192**, 539–52 (2010).
3. Rocco, C. J., Dennison, K. L., Klenchin, V. a., Rayment, I. & Escalante-Semerena, J. C. Construction and use of new cloning vectors for the rapid isolation of recombinant proteins from *Escherichia coli*. *Plasmid* **59**, 231–237 (2008).
4. Blair, J. a *et al.* Branched signal wiring of an essential bacterial cell-cycle phosphotransfer protein. *Structure* **21**, 1590–601 (2013).
5. Childers, W. S. *et al.* Cell fate regulation governed by a repurposed bacterial histidine kinase. *PLoS Biol.* **12**, e1001979 (2014).
6. Thanbichler, M., Iniesta, A. a & Shapiro, L. A comprehensive set of plasmids for vanillate- and xylose-inducible gene expression in *Caulobacter crescentus*. *Nucleic Acids Res.* **35**, e137 (2007).
7. Jacobs, C., Domian, I. J., Maddock, J. R. & Shapiro, L. Cell cycle-dependent polar localization of an essential bacterial histidine kinase that controls DNA replication and cell division. *Cell* **97**, 111–20 (1999).
8. Mazzon, R. R., Lang, E. a S., Silva, C. a P. T. & Marques, M. V. Cold shock genes *cspA* and *cspB* from *Caulobacter crescentus* are posttranscriptionally regulated and important for cold adaptation. *J. Bacteriol.* **194**, 6507–17 (2012).
9. Ertel, A., Marangoni, A. G., Marsh, J., Hallett, F. R. & Woodt, J. M. Mechanical properties of vesicles 1 . Coordinated analyses of osmotic swelling and lysis vesicles : DLS spectroscopy. *Biophys. J.* **64**, (1993).
10. Petrache, H. I., Dodd, S. W. & Brown, M. F. Phosphatidylcholines Determined by 2 H NMR Spectroscopy. *Biophys. J.* **79**, 3172–3192 (2000).

11. Pan, J. Molecular structures of fluid phase phosphatidylglycerol bilayers as determined by small angle neutron and X-ray scattering. *Biochim. Biophys. Acta* **1818**, 2135–2148 (2012).
